# Supplementary material
Source: publisher site journal article supplement (https://www.dovepress.com/get_supplementary_file.php?f=302207.docx)
Supplement: Supplementary file 1 [file get_supplementary_file.php]

**Supplementary Data**

**Supplemental Table 1.1 Univariate analysis for predictors of advanced fibrosis according to obesity phenotypes among fatty liver elderly**

| **Characteristics** | **MHNO** | **MUNO** | **MHO** | **MUO** |
| --- | --- | --- | --- | --- |
|  | **OR (95%CI)** | **OR (95%CI)** | **OR (95%CI)** | **OR (95%CI)** |
| Female (%) | 1 (reference) | 1.97 (1.55−2.50)* | 1.16 (0.99−1.06) | 1.58 (1.22−2.06)* |
| Smoking habit | 1 (reference) | 0.60 (0.41−0.87)* | 1.10 (0.63−1.91) | 0.75 (0.50−1.12) |
| Alcohol consumption | 1 (reference) | 0.61 (0.48−1.55) | 0.38 (0.09−1.63) | 0.57 (0.27−1.21) |
| Diabetes mellitus (%) | 1 (reference) | 4.30 (2.97-6.23)* | 0.44 (0.16−1.26) | 5.22 (3.55−7.70)* |
| Hypertension (%) | 1 (reference) | 2.44 (1.94−3.06)* | 1.25 (0.85−1.85) | 5.51 (4.18−7.28)* |
| Hyperlipidemia (%) | 1 (reference) | 4.01 (2.95−5.46)* | 0.27 (0.10−0.74)* | 4.09 (2.94−5.70)* |
| Fatty liver | 1 (reference) | 2.83 (1.83−4.37)* | 4.30 (2.41−7.68)* | 8.64 (5.65−13.22)* |
| Advanced fibrosis  (NFS > 0.676) | 1 (reference) | 2.03 (1.37−3.02)* | 2.09 (1.14−3.82)* | 6.04 (4.12−8.87)* |
| Advanced fibrosis  (FIB-4 > 2.67) | 1 (reference) | 1.16 (0.79−1.72) | 2.26 (1.31−3.90)* | 1.18 (0.77−1.83) |

**Notes:** *Different from MHNO phenotype (*p < 0.05*).

**Abbreviations:** NFS, NAFLD fibrosis score; FIB-4, fibrosis-4 score; MHNO metabolically healthy non-obese; MUNO metabolically unhealthy non-obese; MHO metabolically healthy obese; MUO metabolically unhealthy obese; OR, odds ratios.

**Supplemental Table 1.2 Univariate analysis for predictors of advanced fibrosis according to obesity phenotypes among fatty liver elderly**

| **Characteristics** | **MHNO** | **MUNO** | **MHO** | **MUO** |
| --- | --- | --- | --- | --- |
|  | **OR (95%CI)** | **OR (95%CI)** | **OR (95%CI)** | **OR (95%CI)** |
| Age (years) | 1 (reference) | 1.04 (1.02−1.06)* | 1.02 (0.99−1.06) | 1.03 (1.01−1.05)* |
| BMI (kg/m2) | 1 (reference) | 1.32 (1.23−1.41) |  |  |
| Waist circumference (cm) | 1 (reference) | 1.10 (1.08−1.12)* | 1.23 (1.19−1.28)* | 1.26 (1.22−1.29)* |
| Systolic BP (mmHg) | 1 (reference) | 1.02 (1.01−1.02)* | 1.01 (1.00−1.02) | 1.03 (1.02−1.04)* |
| Diastolic BP (mmHg) | 1 (reference) | 1.03 (1.02−1.04)* | 1.02 (1.00−1.04)* | 1.05 (1.03−1.06)* |
| Glucose (mg/dL) | 1 (reference) | 1.04 (1.03−1.05)* | 0.99 (0.98−1.01) | 1.05 (1.04−1.06)* |
| Total cholesterol (mg/dL) | 1 (reference) | 1.00 (0.99−1.00)* | 1.00 (1.00−1.01) | 0.99 (0.99−1.00)* |
| HDL-C (mg/dL) | 1 (reference) | 0.95 (0.94−0.96)* | 1.00 (0.98−1.01) | 0.95 (0.94−0.96) |
| LDL-C (mg/dL) | 1 (reference) | 0.99 (0.99−1.00)* | 1.01 (1.00−1.01)* | 0.99 (0.99−1.00)* |
| Triglyceride (mg/dL) | 1 (reference) | 1.02 (1.01−1.02)* | 1.00 (0.99−1.00) | 1.02 (1.01−1.02)* |
| AST (U/L) | 1 (reference) | 1.01 (1.00−1.03) | 1.02 (1.00−1.05)* | 1.03 (1.01−1.04)* |
| ALT (U/L) | 1 (reference) | 1.02 (1.01−1.03)* | 1.01 (0.99−1.03) | 1.03 (1.02−1.04)* |
| Albumin (mg/dL) | 1 (reference) | 1.71 (1.08−2.69)* | 0.34 (0.16−0.75)* | 0.91 (0.55−1.51) |
| Platelet (x109/L) | 1 (reference) | 1.00 (1.00−1.00) | 1.00 (0.99−1.00) | 1.00 (1.00−1.00) |
| NFS | 1 (reference) | 1.63 (1.45−1.83)* | 1.78 (1.44−2.19)* | 2.73 (2.33−3.18)* |
| FIB-4 | 1 (reference) | 0.98 (0.86−1.12) | 1.35 (1.04−1.75)* | 1.01 (0.85−1.21) |

**Notes:** *Different from MHNO phenotype (*p < 0.05*).

**Abbreviations:** BMI, body mass index; BP, blood pressure; HDL-C, high-density lipoprotein cholesterol; LDL-C, low-density lipoprotein cholesterol; AST, aspartate aminotransaminase; ALT, alanine transaminase; NFS, NAFLD fibrosis score; FIB-4, fibrosis-4 score; MHNO metabolically healthy non-obese; MUNO metabolically unhealthy non-obese; MHO metabolically healthy obese; MUO metabolically unhealthy obese; OR, odds ratios.

**Supplemental Table 2.1 Characteristics of female study participants according to obesity phenotypes**

| **Characteristics** | **MHNO** | **MUNO** | **MHO** | **MUO** | ***p* value** |
| --- | --- | --- | --- | --- | --- |
| n, % of female participants (%) | 345 (28.0) | 499 (40.6) | 82 (6.7) | 304 (24.7) |  |
| Smoking habit |  |  |  |  | 0.88 |
| Nonsmoker (%) | 343 (99.4) | 495 (99.2) | 82 (100.0) | 302 (99.3) |  |
| Social smoker (%) | 1 (0.3) | 2 (0.4) | 0 (0) | 0 (0) |  |
| Current smoker (%) | 1 (0.3) | 2 (0.4) | 0 (0) | 2 (0.7) |  |
| Alcohol consumption |  |  |  |  | 0.62 |
| No drinking (%) | 329 (95.4) | 480 (96.2) | 80 (97.6) | 288 (94.7) |  |
| Social drinking (%) | 16 (4.6) | 19 (3.8) | 2 (2.4) | 16 (5.3) |  |
| Diabetes mellitus (%) | 16 (4.6) | 112 (22.4) | 3 (3.7) | 82 (27.0) | < .001 |
| Hypertension (%) | 113 (32.8) | 289 (57.9) | 35 (42.7) | 231 (76.0) | < .001 |
| Hyperlipidemia (%) | 40 (11.6) | 158 (31.7) | 3 (3.7) | 96 (31.6) | < .001 |
| Total numbers of metabolic factors |  |  |  |  | < .001 |
| None (%) | 28 (8.1) | 0 (0) | 1 (1.2) | 0 (0) |  |
| One factor (%) | 102 (29.6) | 0 (0) | 10 (12.2) | 0 (0) |  |
| Two factors (%) | 215 (62.3) | 0 (0) | 71 (86.6) | 0 (0) |  |
| Three factors (%) | 0 (0) | 246 (49.3) | 0 (0) | 135 (44.4) |  |
| Four factors (%) | 0 (0) | 177 (35.5) | 0 (0) | 114 (37.5) |  |
| Five factors (%) | 0 (0) | 76 (15.2) | 0 (0) | 55 (18.1) |  |
| Fatty liver |  |  |  |  | < .001 |
| Mild (%) | 339 (95.7) | 430 (86.2) | 67 (81.7) | 215 (70.7) |  |
| Moderate-severe (%) | 15 (4.3) | 69 (13.8) | 15 (18.3) | 89 (29.3) |  |
| NFS category |  |  |  |  | < .001 |
| No-mild fibrosis (NFS ≤ 0.676) (%) | 328 (95.1) | 451 (90.4) | 74 (90.2) | 223 (73.4) |  |
| Advanced fibrosis (NFS > 0.676) (%) | 17 (4.9) | 48 (9.6) | 8 (9.8) | 81 (26.6) |  |
| FIB-4 category |  |  |  |  | 0.002 |
| No-mild fibrosis (FIB-4 ≤ 2.67) (%) | 326 (94.5) | 460 (92.2) | 67 (81.7) | 279 (91.8) |  |
| Advanced fibrosis (FIB-4 > 2.67) (%) | 19 (5.5) | 39 (7.8) | 15 (8.3) | 25 (8.2) |  |

**Abbreviations:** NFS, NAFLD fibrosis score; FIB-4, fibrosis-4 score; MHNO metabolically healthy non-obese; MUNO metabolically unhealthy non-obese; MHO metabolically healthy obese; MUO metabolically unhealthy obese.

**Supplemental Table 2.2 Characteristics of female study participants according to obesity phenotypes**

| Characteristics | MHNO | MUNO | MHO | MUO |
| --- | --- | --- | --- | --- |
| Age (years) | 71.0 (5.3) | 72.9 (5.7)† | 72.4 (5.2) | 72.9 (5.7)† |
| BMI (kg/m2) | 23.6 (1.8) | 24.4 (1.6)† | 29.3 (2.3)†‡ | 29.7 (2.5)†‡ |
| Waist circumference (cm) | 79.0 (6.8) | 84.0 (6.3)† | 92.0 (9.6) | 92.3 (9.7)†‡ |
| Systolic BP (mmHg) | 134.0 (19.7) | 142.7 (21.4)† | 138.4 (17.5) | 146.9 (20.6)†‡§ |
| Diastolic BP (mmHg) | 68.6 (10.7) | 72.3 (10.3)† | 70.2 (10.4) | 73.6 (10.1)† § |
| Glucose (mg/dL) | 99.1 (12.7) | 114.3 (24.6)† | 98.2 (16.1) | 117.5 (24.3)† ‡§ |
| Total cholesterol (mg/dL) | 203.7 (33.9) | 195.6 (36.3)† | 205.1 (34.4) | 192.7 (34.2)†§ |
| HDL-C (mg/dL) | 65.0 (13.7) | 53.2 (13.1)† | 62.2 (11.1)‡ | 54.3 (11.8)†§ |
| LDL-C (mg/dL) | 120.4 (32.0) | 115.9 (33.3) | 126.6 (32.2)‡ | 114.2 (30.9)§ |
| Triglyceride (mg/dL) | 103.3 (40.7) | 150.8 (74.0)† | 99.9 (34.1)‡ | 139.0 (64.8)†§ |
| AST (U/L) | 23.0 (5.8) | 24.4 (9.6) | 25.7 (11.2) | 25.6 (10.4)† |
| ALT (U/L) | 20.0 (7.6) | 23.2 (12.1) † | 22.5 (12.6) | 24.6 (12.8)† |
| Albumin (mg/dL) | 4.3 (0.2) | 4.3 (0.2) | 4.2 (0.2)†‡ | 4.3 (0.2) § |
| Platelet (x109/L) | 226.0 (51.8) | 228.9 (51.8) | 217.0 (49.1) | 228.7 (61.0) |
| NFS | −1.059 (1.0) | −0.484 (0.9)† | −0.4.37 (0.8)† | 0.083 (1.1)†‡§ |
| FIB-4 | 1.74 (0.6) | 1.74 (0.6) | 1.94 (0.8) | 1.81 (0.7) |

**Notes:** †Different from MHNO phenotype (*p < 0.05*); ‡Different from MUNO phenotypes (*p < 0.05*); §Different from MHO phenotype (*p < 0.05*).

**Abbreviations:** BMI, body mass index; BP, blood pressure; HDL-C, high-density lipoprotein cholesterol; LDL-C, low-density lipoprotein cholesterol; AST, aspartate aminotransaminase; ALT, alanine transaminase; NFS, NAFLD fibrosis score; FIB-4, fibrosis-4 score; MHNO metabolically healthy non-obese; MUNO metabolically unhealthy non-obese; MHO metabolically healthy obese; MUO metabolically unhealthy obese.

**Supplemental Table 3.1 Characteristics of male study participants according to obesity phenotypes**

| **Characteristics** | **MHNO** | **MUNO** | **MHO** | **MUO** | ***p* value** |
| --- | --- | --- | --- | --- | --- |
| n, % of male participants (%) | 235 (40) | 172 (74.4) | 82 (29.3) | 131 (22.3) |  |
| Smoking habit |  |  |  |  | 0.62 |
| Nonsmoker (%) | 214 (91.1) | 153 (89.0) | 47 (95.9) | 123 (93.9) |  |
| Social smoker (%) | 8 (3.4) | 6 (3.5) | 0 (0) | 3 (2.3) |  |
| Current smoker (%) | 13 (5.5) | 13 (7.6) | 2 (4.1) | 5 (3.8) |  |
| Alcohol consumption |  |  |  |  | 0.26 |
| No drinking (%) | 177 (75.3) | 137 (79.7) | 33 (67.3) | 104 (79.4) |  |
| Social drinking (%) | 58 (24.7) | 35 (20.3) | 16 (32.7) | 27 (20.6) |  |
| Diabetes mellitus (%) | 23 (9.8) | 47 (27.3) | 1 (2.0) | 37 (28.2) | < .001 |
| Hypertension (%) | 101 (43.0) | 105 (61.0) | 21 (42.9) | 101 (77.1) | < .001 |
| Hyperlipidemia (%) | 22 (9.4) | 60 (34.9) | 1 (2.0) | 47 (35.9) | < .001 |
| Total numbers of metabolic factors |  |  |  |  | < .001 |
| None (%) | 17 (7.2) | 0 (0) | 2 (4.1) | 0 (0) |  |
| One factor (%) | 85 (36.2) | 0 (0) | 7 (14.3) | 0 (0) |  |
| Two factors (%) | 133 (56.6) | 0 (0) | 40 (81.6) | 0 (0) |  |
| Three factors (%) | 0 (0) | 114 (66.3) | 0 (0) | 63 (48.1) |  |
| Four factors (%) | 0 (0) | 49 (28.5) | 0 (0) | 47 (35.9) |  |
| Five factors (%) | 0 (0) | 9 (5.2) | 0 (0) | 21 (16.0) |  |
| Fatty liver |  |  |  |  | < .001 |
| Mild (%) | 221 (94.0) | 154 (89.5) | 40 (81.6) | 84 (64.1) |  |
| Moderate-severe (%) | 14 (6.0) | 18 (10.5) | 9 (18.4) | 47 (35.9) |  |
| NFS category |  |  |  |  | < .001 |
| No-mild fibrosis (NFS ≤ 0.676) (%) | 213 (90.6) | 134 (77.9) | 40 (81.6) | 80 (61.1) |  |
| Advanced fibrosis (NFS > 0.676) (%) | 22 (9.4) | 38 (22.1) | 9 (18.4) | 51 (38.9) |  |
| FIB-4 category |  |  |  |  | 0.93 |
| No-mild fibrosis (FIB-4 ≤ 2.67) (%) | 206 (87.7) | 147 (85.5) | 42 (85.7) | 114 (87.0) |  |
| Advanced fibrosis (FIB-4 > 2.67) (%) | 29 (12.3) | 25 (14.5) | 7 (14.3) | 17 (13.0) |  |

**Abbreviations:** NFS, NAFLD fibrosis score; FIB-4, fibrosis-4 score; MHNO metabolically healthy non-obese; MUNO metabolically unhealthy non-obese; MHO metabolically healthy obese; MUO metabolically unhealthy obese.

**Supplemental Table 3.2 Characteristics of male study participants according to obesity phenotypes**

| Characteristics | MHNO | MUNO | MHO | MUO |
| --- | --- | --- | --- | --- |
| Age (years) | 73.8 (6.1) | 74.7 (6.4) | 73.8 (6.2) | 74.1 (6.2) |
| BMI (kg/m2) | 24.0 (1.8) | 25.0 (1.6)† | 28.9 (1.9)†‡ | 29.6 (3.0)†‡ |
| Waist circumference (cm) | 84.5 (5.1) | 89.1 (5.7)† | 94.2 (7.4) †‡ | 98.6 (6.8)†‡ § |
| Systolic BP (mmHg) | 135.1 (20.0) | 137.9 (18.2) | 136.3 (20.0) | 143.8 (18.4)†‡ |
| Diastolic BP (mmHg) | 70.6 (10.3) | 72.6 (10.39) | 74.8 (11.8) | 75.5 (9.4)† |
| Glucose (mg/dL) | 105.5 (23.5) | 118.8 (31.1)† | 102.4 (11.2) ‡ | 116.8 (20.1)† § |
| Total cholesterol (mg/dL) | 187.6 (31.0) | 176.9 (33.5)† | 194.4 (36.4) ‡ | 180.8 (30.3) |
| HDL-C (mg/dL) | 52.6 (12.1) | 43.4 (10.2)† | 54.5 (12.5)‡ | 46.4 (10.2)†§ |
| LDL-C (mg/dL) | 115.0 (29.3) | 102.6 (29.6) † | 120.5 (33.8)‡ | 107.5 (28.9) |
| Triglyceride (mg/dL) | 101.1 (38.9) | 156.1 (82.9)† | 96.8 (41.5)‡ | 135.9 (62.2)† ‡§ |
| AST (U/L) | 24.4 (8.7) | 24.1 (8.0) | 24.1 (6.6) | 24.8 (10.6) |
| ALT (U/L) | 23.1 (12.8) | 24.2 (13.2) | 22.5 (8.5) | 27.0 (17.2) |
| Albumin (mg/dL) | 4.3 (0.3) | 4.4 (0.3) | 4.3 (0.3) | 4.3 (0.3) |
| Platelet (x109/L) | 207.2 (48.0) | 202.3 (50.0) | 196.1 (49.0) | 199.8 (46.5) |
| NFS | −0.519 (1.0) | −0.005 (1.0)† | −0.050 (0.8)† | 0.393 (0.9)†‡§ |
| FIB-4 | 1.97 (0.7) | 2.06 (1.5) | 2.06 (0.7) | 1.92 (0.7) |

**Notes:** †Different from MHNO phenotype (*p < 0.05*); ‡Different from MUNO phenotypes (*p < 0.05*); §Different from MHO phenotype (*p < 0.05*)

**Abbreviations:** BMI, body mass index; BP, blood pressure; HDL-C, high-density lipoprotein cholesterol; LDL-C, low-density lipoprotein cholesterol; AST, aspartate aminotransaminase; ALT, alanine transaminase; NFS, NAFLD fibrosis score; FIB-4, fibrosis-4 score; MHNO metabolically healthy non-obese; MUNO metabolically unhealthy non-obese; MHO metabolically healthy obese; MUO metabolically unhealthy obese.
